DMI resistance in *Bgh*

1     Analysis of mutations in West Australian populations of *Blumeria*  
2             *graminis* f. sp. *hordei* CYP51 conferring resistance to DMI  
3                     fungicides.

4  
5     M. A. Tucker<sup>1</sup>, F. Lopez-Ruiz<sup>1</sup>, H. J. Cools<sup>2</sup>, J. G. L. Mullins<sup>3</sup>, K. Jayasena<sup>4</sup> and R. P. Oliver<sup>1</sup>

6     <sup>1</sup> Centre for Crop and Disease Management, School of Molecular and Life Sciences, Curtin  
7     University, Western Australia 6102, Australia

8     <sup>2</sup> Biological Chemistry and Crop Protection, Rothamsted Research, Harpenden, Hertfordshire  
9     AL5 2JQ, United Kingdom, current address Syngenta, Jealott's Hill International Research  
10    Centre, Bracknell, UK

11    <sup>3</sup> Institute of Life Science and College of Medicine, Swansea University, Swansea, Wales  
12    SA2 8PP, United Kingdom.

13    <sup>4</sup> Department of Primary Research and Industry Development, Albany 6330, WA Australia.

14    \* Corresponding author: email - [richard.oliver@curtin.edu.au](mailto:richard.oliver@curtin.edu.au)  
15  
16

## DMI resistance in *Bgh*

### 17 **Summary**

18 Powdery mildew caused by *Blumeria graminis* f. sp. *hordei* (*Bgh*) is a constant threat to  
19 barley production but is generally well controlled through combinations of host genetics and  
20 fungicides. An epidemic of barley powdery mildew was observed from 2007 to 2013 in the  
21 West Australian wheatbelt (WA). We collected isolates, examined their sensitivity to  
22 demethylation inhibitor (DMI) fungicides and sequenced the Cyp51B target gene. Five amino  
23 acid substitutions were found of which four were novel. A clear association was established  
24 between combinations of mutations and altered levels of resistance to DMIs. The most  
25 resistant genotypes increased in prevalence from 0 in 2009 to 16% in 2010 and 90% in 2011.  
26 Yeast strains expressing the *Bgh* Cyp51 genotypes replicated the altered sensitivity to various  
27 DMIs and these results were confirmed by *in silico* protein docking studies.

28

29

### 30 **Keywords:**

31 Triazoles, DMI, fungicide, *Blumeria graminis* f. sp. *hordei* (barley powdery mildew), *CYP51*,  
32 cross resistance

33

## DMI resistance in *Bgh*

### 34 **Introduction**

35 *Blumeria graminis* f. sp. *hordei* (*Bgh*) is an ascomycete fungus causing barley (*Hordeum*  
36 *vulgare* L.) powdery mildew. In conducive seasons this biotrophic pathogen can reduce yields  
37 by as much as 20% (Murray & Brennan, 2010) but is generally well controlled by host  
38 genetics including the durable recessive *mlo* gene (Buschges et al., 1997), dominant major R-  
39 genes and combinations of minor genes. In cases where the genetics is inadequate, fungicides  
40 can be used. Many classes of fungicides have been used to control powdery mildew but the  
41 pathogens have a marked propensity to develop resistance rapidly (FRAG, 2014, Grimmer et  
42 al., 2015).

43 Since 1995 the majority of the West Australian (WA) barley area has been planted to  
44 susceptible cultivars and there has been a steep increase in fungicide use (Tucker, 2015). In  
45 2009, 85% of barley crops were treated with one or more fungicide (both seed and foliar)  
46 taken from a list of registered chemicals consisting of almost exclusively of DMIs (Murray &  
47 Brennan, 2010, ABARES, 2014).

48 DMI fungicides have been in the forefront of control of fungal pathogens of humans, animals  
49 and plants for nearly 50 years (Brent & Hollomon, 2007). These fungicides interrupt the  
50 biosynthesis of ergosterol (and other mycosterols in powdery mildews) by inhibiting  
51 cytochrome P450 14 $\alpha$ -sterol demethylase (*CYP51*) (Senior et al., 1995, Dupont et al., 2012).  
52 Resistance is now common in human pathogens, including *Candida* spp. (Xiang et al., 2013,  
53 Hull et al., 2012) and *Aspergillus fumigatus* (Lelièvre et al., 2013), and is a serious problem  
54 in agricultural systems (Cools et al., 2013, Oliver & Hewitt, 2014). Fungicide resistance has  
55 been associated with a number of mechanisms including the alteration and overexpression of  
56 the *CYP51* as well as enhanced DMI efflux (Omrane et al., 2015, Cools & Fraaije, 2008,  
57 Cools et al., 2013).

58

59 The most commonly observed mechanism of resistance is non-synonymous changes in the  
60 gene sequence of *Cyp51* (Cools et al., 2013). A large number of non-synonymous changes  
61 have been observed in *Cyp51A* and *B* genes of various fungal pathogens. A unified  
62 nomenclature for these changes has been proposed and will be adopted in this report (Mair et  
63 al., 2016). Two earlier studies examining DMI resistance in *Bgh* in Europe identified *CYP51*  
64 changes, *Y137F* and *K148Q* (equivalent to *Y136F* and *K147Q*) (Délye et al., 1998, Wyand &  
65 Brown, 2005). Isolates with only *Y137F* exhibited both low and high levels of triadimenol

## DMI resistance in *Bgh*

66 resistance and *K148Q* was only ever found in combination with *Y137F*. Hence the exact  
67 sensitivity shift afforded by each mutation remains unclear.

68 West Australian farmers reported a reduction in the effectiveness of DMIs in controlling  
69 barley powdery mildew outbreaks since 2005 (GRDC, 2012). Tebuconazole-containing  
70 formulations were registered for barley mildew from 1995 in WA (APVMA, 2014) and  
71 initially provided good control of leaf rust, powdery mildew and other diseases (Tucker,  
72 2015). However, since 2005, accounts of mildew infection on barley treated with  
73 tebuconazole formulations in particular have extended over much of the southern agricultural  
74 cropping region with the frequency of reports greatly increasing since 2009 (Lord, 2014).

75 In this study we have determined the sensitivity of Australian *Bgh* isolates to DMI fungicides  
76 registered in WA for use on barley. Sequencing of the *CYP51* coding region in a subset of  
77 isolates revealed five mutational changes defining four unique genotypes. The fungicide  
78 sensitivities of isolates representing each genotype were determined both by screening on  
79 fungicide-treated detached leaves and heterologous expression in *Saccharomyces cerevisiae*.  
80 Our results link variations in DMI sensitivity to changes in *CYP51*. *In silico* protein structural  
81 modelling demonstrated the conformational changes afforded by mutations having significant  
82 effects on DMI sensitivity and was able to rationalise our observations of partial cross-  
83 resistance. A brief report on some this data has been published earlier (Tucker et al., 2015).

## 84 **Materials and Methods**

### 85 ***Blumeria graminis* f. sp. *hordei***

#### 86 **Isolates**

87 One hundred and nineteen *Bgh* isolates were collected from 2009 to 2013 (Figure 1,  
88 Supporting Information Table S1). Isolates from Wagga Wagga, Tamworth (New South  
89 Wales) and Launceston (Tasmania) were supplied by the Department of Environment and  
90 Primary Industries, Victoria. Isolate purification, sub-culturing and assessments of growth  
91 were performed according to Tucker (2013).

#### 92 **Fungicide sensitivity assays**

93 Fungicide sensitivities were determined by assessing growth of isolates on susceptible (cv.  
94 Baudin) barley leaves inserted into fungicide-amended media. Commercial formulations of

## DMI resistance in *Bgh*

95 DMIs currently registered for *Bgh* control – Laguna (720g L<sup>-1</sup> tebuconazole, Sipcam),  
96 Flutriafol (250g L<sup>-1</sup> flutriafol, Imtrade Australia), Opus (125g L<sup>-1</sup> epoxiconazole, Nufarm),  
97 Alto (100g L<sup>-1</sup> cyproconazole, Nufarm), Tilt (418g L<sup>-1</sup> propiconazole, Syngenta), Proline  
98 (410g L<sup>-1</sup> prothioconazole, Bayer Crop Science), Triad 125 (125g L<sup>-1</sup> triadimefon, Farnoz)  
99 and Jockey Stayer (167g L<sup>-1</sup> fluquinconazole, Bayer Crop Science) - were incorporated into  
100 agar amended with 50mg L<sup>-1</sup> of benzimidazole (Chan & Boyd, 1992). Middle sections of 10  
101 day old seedlings were excised with each tip inserted abaxial side up into fungicide amended  
102 agar. A wide range of concentrations was tested to identify a specific set of 6 needed to  
103 calculate an accurate EC<sub>50</sub> for each product. Each isolate was inoculated onto three replicates  
104 on successive weeks with conidia dislodged 24h before use to promote fresh growth. Conidia  
105 were collected on glossy black paper and blown into a 1.5m infection tower to ensure even  
106 inoculation. Following 7 days growth at 20±2°C in a 12:12 h light:dark photoperiod, the  
107 growth of each isolate was assessed using a 0-4 infection type (IT) scale adapted from  
108 Czembor (2000). Each pustule formation was assigned an IT and the average for each isolate  
109 and fungicide concentration was determined. Both the average IT and concentration was log  
110 transformed, % inhibition calculated and plotted to determine the regression equation and  
111 correlation coefficient. The mean 50% effective concentration (EC<sub>50</sub>) with associated errors  
112 were calculated for each *Bgh Cyp51* genotype (Fig 3). Data analysis was conducted in JMP,  
113 v10 (SAS Institute Inc. Cary, NC).

### 114 ***CYP51* sequencing**

115 DNA isolations were performed using a BioSprint 15 DNA Plant Kit (Qiagen) following the  
116 manufacturer's instructions. The wild type *Bgh* DH14 isolate (GenBank accession no.  
117 AJ313157) was used to design primers (Supporting Information Table S2) covering the entire  
118 length of the *Bgh CYP51* (*Bgh51*) gene including the promoter region (Supporting  
119 Information Fig. S1). The amplicons of 76 isolates were sequenced using Sanger sequencing  
120 and aligned in Geneious v 5.5 (Biomatters). All sequences have been submitted to GenBank  
121 (Accession no. KM016902, KM016903, KM016904 and KM016905). A high-throughput  
122 method of *S524* and *T524* allele detection was devised ((digesting the amplicon of *Bgh51\_3F*  
123 and *Bgh51\_3R* with Hpy8I) (Supporting Information Table S2)), and used to determine the  
124 *CYP51 524* genotype of all 119 isolates.

### 125 **Yeast Phenotyping**

### 126 **Strains and complementation of transformants**

## DMI resistance in *Bgh*

127 Synthesis of the wild type DH14 (Accession no. AJ313157) *CYP51* gene (*Bgh51wt*) was  
128 carried out by GENEWIZ Inc. (South Plainfield, NJ). Terminal restriction enzyme  
129 recognition sites for Kpn1 and EcoR1 were added at the 5' and 3' ends respectively. The  
130 pYES-*Bgh51wt* expression plasmid was constructed by cloning *Bgh51wt* into pYES3/CT  
131 (Invitrogen, Carlsbad, CA). pYES-*Bgh51wt* was sequenced to ensure the fidelity and  
132 transformed into *S. cerevisiae* YUG37:*erg11* (*MATa ura3-52 trp1-63 LEU2::tTa tetO-*  
133 *CYC1::ERG11*) with its native *Cyp51* gene under the control of a *tetO-CYC1* promoter,  
134 repressed in the presence of doxycycline (Parker et al., 2008). All complementation assays  
135 were performed according to Cools *et al* (2010) with photographs taken following 72h of  
136 growth at 20°C (Supporting Information Fig. S2). Mutations found in *Bgh51* of Australian  
137 isolates were introduced into pYES-*Bgh51wt* through a QuickChange II site-directed  
138 mutagenesis kit (Stratagene, La Jolla, CA).

### 139 **Comparative growth rate assay of transformants**

140 The growth rate of transformants was assessed using the Gen 5 data analysis software  
141 (BioTek Instruments, Inc. Winooski, VT) where duplicate cultures of replicate transformants  
142 were grown in SD GAL + RAF medium (SD medium) overnight at 30°C. One hundred  
143 microliters of each overnight culture, at  $10^5$  cells ml<sup>-1</sup>, was used to inoculate 3 wells  
144 containing 200µl SD medium ±3µg ml<sup>-1</sup> doxycycline. Cultures were incubated without light  
145 at 30°C, and the optical density at 600nm (OD<sub>600</sub>) was measured every 15min for 12 days in a  
146 Synergy™ HT Multi-Mode Microplate Reader (BioTek Instruments, Inc Winonski, VT). The  
147 mean maximum growth rate for each strain ± doxycycline was determined on the basis of the  
148 greatest increase in OD over a 2h period (Supporting Information Table S4).

### 149 **Fungicide sensitivity assays**

150 Sensitivity assays were carried out as described by Cools *et al.* (2010) using pure samples of  
151 tebuconazole, cyproconazole, propiconazole, epoxiconazole, fluquinconazole, triadimefon,  
152 flutriafol and desthioconazole with a fungicide free control. As prothioconazole must be  
153 activated in plant tissue (Parker et al., 2013), desthioconazole was used in all yeast assays.

### 154 **Structural modelling**

155 Structural modelling of *Bgh51wt* and mutant forms and ligand docking of epoxiconazole and  
156 fluquinconazole was undertaken using an automated homology modelling platform as  
157 previously described for *Zymoseptoria tritici* CYP51 (Mullins et al., 2011). The volume of

## DMI resistance in *Bgh*

158 the heme cavity of the wild type and variant protein models was determined using Pocket-  
159 Finder (Leeds, UK) based on Ligsite (Hendlich et al., 1997).

160

## 161 **Results**

### 162 **DNA sequencing**

163 A trial set of *Bgh* isolates were assessed for susceptibility on detached leaves to fungicides  
164 then used in WA to control powdery mildew. Substantial variation in resistance was  
165 observed. Due to the complexities of the phenotyping assay, we decided to sequence the  
166 *CYP51* gene first and then determine fungicide sensitivity of isolates from each genotype  
167 class.

168 Primers were designed spanning both the coding and promoter region of the single *CYP51B*  
169 gene (Becher & Wirsal, 2012) in *Bgh* (Supporting Information Table S3, Supporting  
170 Information Fig. S1). The *Bgh51wt* DH14 sequence was used as a reference (Spanu et al.,  
171 2010). *CYP51* was sequenced from 76 Australian isolates collected from 2009 to 2013,  
172 including three from Eastern Australia. No indels were found in the promoter but two  
173 synonymous and five non-synonymous changes were identified in the coding region (Fig. 2).  
174 All Australian isolates carried previously seen the tyrosine to phenylalanine mutation at  
175 amino acid position 136 (*Y137F*) (Wyand & Brown, 2005, Délye et al., 1998). All three  
176 isolates from the east of Australia carried two synonymous changes at nucleotides 81 and  
177 1475, which were absent in WA isolates. Further non-synonymous mutations were found;  
178 *K172E* (K171E), *M304I* (M301I), *R330G* (R327G) and *S524T* (S509T) in various  
179 combinations (Figure 2). Considering only the non-synonymous changes, four novel *Bgh51*  
180 genotypes were distinguished. Isolates collected in WA were either *F137/T524* (genotype 2)  
181 or *F137/I304/G330/T524* (genotype 4) while isolates from other Australian states were either  
182 *F137/E172* (genotype 3) or *F137* (genotype 1). Mutations *I304* and *G330* were consistently  
183 found together in the same isolates (Figure 2).

184 There was both spatial and temporal variation in the frequency of genotypes (Figure 1,  
185 Supporting Information Table S1). All isolates collected in 2009 were wild type at *CYP51*  
186 position 524. The proportion of mutant *T524* isolates dramatically increased over subsequent

## DMI resistance in *Bgh*

187 seasons; 99 of the 116 WA isolates collected in 2011 contained the *T524* mutation. These  
188 mutants were found in all major WA barley growing areas (Figure 1).

### 189 **DMI sensitivities of *Bgh* isolates**

190 The sensitivities of 18 *Bgh* isolates (2 isolates from genotypes 2 and 3; 7 from 1 and 4) were  
191 determined using detached barley leaves inserted into DMI-amended agar. The results varied  
192 between genotype and fungicide (Figure 3, Supporting Information Fig. S4). There was no  
193 significant differences in the mean EC50 of *S524* isolates (genotypes 1 and 3) or between  
194 isolates with the *T524* mutation (genotypes 2 and 4). Isolates of genotypes 2 and 4 were  
195 found to have significantly higher mean EC50 values than genotypes 1 and 3 for most of the  
196 DMIs tested. The mean EC50s for *T524* genotypes ranged from 1.88 ug.ml<sup>-1</sup> for triadimefon,  
197 3.73 ug.ml<sup>-1</sup> for propiconazole to 29.88 ug.ml<sup>-1</sup> for tebuconazole. The estimated resistance  
198 factors ranged from 3.41 for propiconazole to 17.6 for tebuconazole. However, for  
199 fluquinconazole (used solely in WA in seed dressing formulations) mutant *T524* genotypes  
200 were marginally more sensitive (EC50 4.73 ug.ml<sup>-1</sup>; RF = 0.58). Unfortunately, due to  
201 quarantine restrictions we were not able to phenotype the *Bgh CYP51* DH14 isolate carrying  
202 the wild type *Y137* allele.

### 203 **Heterologous expression in yeast**

204 The *Bgh51wt* gene was synthesized and cloned into *S. cerevisiae* YUG37:*erg11* with a  
205 doxycycline repressible promoter. The *S. cerevisiae Bgh51wt* transformant was able to grow  
206 in the presence of doxycycline (Supporting Information Fig. S2) and for most variants there  
207 was no significant difference in the growth rates in the absence of doxycycline. Two *S.*  
208 *cerevisiae Bgh51* variants (pYES-*Bgh51\_Y137F/S524T/R330G* and pYES-  
209 *Bgh51\_Y137F/M304I/R330G/S524T*) had significantly lower rates and were therefore  
210 removed from all further *in vitro* analysis.

211 The DMI sensitivities of *S. cerevisiae* strains expressing *Bgh51* variants which restored  
212 growth on doxycycline-amended medium were determined (Supporting Information Table 4)  
213 and resistance factors were calculated (Table 1). Modest RFs were associated with the solo  
214 *K172E* and *M304I* mutations. RFs for the *S524T* mutation varied from 0.5 for  
215 fluquinconazole to 12.4 for propiconazole. The combination of *F137* and *T524* had much  
216 larger RFs of 340.6 for propiconazole and 33.2 for tebuconazole. RFs for fluquinconazole  
217 were <1.0 except for the solo *Y137F* construct with a calculated RF of 9.7.



## DMI resistance in *Bgh*

### 218 **Structural modelling**

219 Protein variants of all *Bgh51* genotypes were modelled *in silico* (Supporting Information Fig  
220 S5). The effect that each mutational change had on the volume of the heme cavity containing  
221 the DMI binding site and the morphological changes to the cavity access channel were  
222 determined (Table 2). Modest volume increases in binding cavity were observed with the  
223 introduction of the solo mutations; a 17.7% increase with *K172E* and 39.6% increase in  
224 volume with *Y137F*. Mutation *S524T* was an exception, with an increase in the volume of the  
225 heme cavity by 73.2% compared to that of the wild type model. The combination of  
226 *F137/T524* gave an even more substantial increase in volume of 83.9%. Table 2 also shows  
227 the estimated distances between amino acids *Y226* (Y222) and *S521* (S506), which span the  
228 entrance to the channel leading to the DMI binding site. Modelling simulations predicted that  
229 all *Bgh* CYP51 mutations observed in WA would cause a restriction in the diameter of the  
230 access channel when compared to wild type *Bgh* CYP51. The most dramatic decrease was  
231 observed with the introduction of the *Y137F* mutation, which caused a 28.5% decrease in  
232 channel diameter compared to the wild type model. The combination of *Y137F* and *S524T* in  
233 a single model did not result in a further significant restriction (Table 2).

234

235 Further morphological changes were observed that may impact DMI binding. In particular  
236 conformation of a loop of beta turn running from *S520* (S505) to *F523* (F508) is markedly  
237 different in the *Y137F* genotype to that of the wild type, with the result that it projects into the  
238 cavity. A similar constriction is observed for the *F137/T524* mutant (Supporting Information  
239 Fig. S5b). However, in this case it is also accompanied by a substantial increase in cavity  
240 volume (Table 2), consistent with the exceptional resistance factors observed. It is interesting  
241 to note that this loop is adjacent to *S524*. This supports the idea that the structural changes  
242 brought about by the *Y137F* mutation on its own may exert selective pressure on the 524  
243 position, leading to the *F137/T524* mutant.

244

245 Fluquinconazole docking studies were carried out to elucidate the mechanistic reasons for the  
246 contrasting cross resistance patterns (Figure 4b). In the wild type structure, the binding site of  
247 fluquinconazole is bordered by amino acids *Y123* and *Y226*. It appears that the position of  
248 *Y123* is particularly important in establishing the correct orientation of fluquinconazole so as  
249 to be coordinated by the heme. This arrangement is disrupted in the *Y137F* mutant, where  
250 *Y123* and *S521* prevent fluquinconazole accommodation (Figure 4b). With the *Y137F/S524T*  
251 mutant, *Y123* is positioned similarly to the wild type, allowing accommodation of

## DMI resistance in *Bgh*

252 fluquinconazole as in the wild type. Here *S52I* borders the binding site and is predicted to  
253 interact with the fluquinconazole ligand (Figure 4c). Thus it appears the relative  
254 inconsistency of the *Y137F* mutant and enhanced selection of the *Y137F/S524T* double  
255 mutant can be explained by the 3D docking results.

## 256 **Discussion**

257 Studies best exemplified by the wheat pathogen *Zymoseptoria tritici* have discussed the  
258 relationship between mutational changes in *CYP51* with failures of DMI fungicides in the  
259 field. DMIs have been used since the first registration in the UK of triadimefon in 1973 UK  
260 (Russell, 2005). Twenty years later, *Z. tritici* isolates were found with *CYP51* changes  
261 conferring reductions in sensitivity (Cools et al., 2013). Subsequently, numerous DMIs and  
262 related compounds have been introduced and 34 additional *CYP51* mutations have been  
263 identified. This long history of chemical use and the comparatively recent identification of  
264 mutations has made it difficult to discern cause and effect. The situation in WA is far simpler:  
265 DMI use has been widespread only since 2004 with the first reports of resistance dating from  
266 2005. Furthermore, usage in WA has been dominated by tebuconazole and propiconazole  
267 (Tucker et al., 2015).

268 Analysis of the single *CYP51* gene of Australian *Bgh* isolates collected from 2009 to 2013  
269 revealed four genotypes. The sensitivities of isolates from different genotypes on detached  
270 leaves varied between the DMIs tested. *Bgh* isolates with genotypes harbouring the *S524T*  
271 mutation were less sensitive to all the foliar fungicides used on barley in WA and more  
272 sensitive to fluquinconazole. The *Y137F* mutation was found in all isolates examined  
273 including those from the east of Australia, where as yet there have been no reports of DMI  
274 field failure. Previous phenotypic tests (Wyand & Brown, 2005, Délye et al., 1998) correlated  
275 the presence of the *Y137F* mutation with strong resistance to triadimenol. We were unable  
276 import the wild type *CYP51 Bgh* isolate DH14 in Australia due to quarantine restrictions.  
277 However *Y137F* expression in the heterologous yeast system showed only modest decreases  
278 in sensitivity to most DMIs including triadimenol (Table 1). This suggests that *Y137F* would  
279 lead to only small reductions in the DMI field efficacy. The ubiquity of *Y137F* in Australia  
280 suggests two possibilities; (1) the limited fungicide use in eastern of Australia has been  
281 sufficient to select for this mutation or (2) the wild type *CYP51* genotype has never been  
282 present in Australia.

## DMI resistance in *Bgh*

283 A search was conducted on the *CYP51* mutations in other fungal species reported as  
284 conferring a reduction in DMI sensitivity. The *Bgh51* amino acid sequence of Australian  
285 genotypes was aligned with *Z. tritici* CYP51 (Figure 2). Mutational changes at the amino  
286 acids 137, 304, 330 and 524 fall in regions conserved between *Bgh* and *Z. tritici* (Becher &  
287 Wirsel, 2012). Amino acids 136 and 509 in *Bgh51* correspond to 137 and 524 in *Z. tritici*  
288 which have previously been correlated with alterations in DMI sensitivity (Cools et al.,  
289 2011). The combination of *Y137F* and *S524T* was associated with substantial RFs in both the  
290 *Z. tritici* strains and the yeast transformants. This study did not test fluquinconazole or the  
291 solo *Y137F* genotype in the yeast system.

292 In the current study the combination of *Y137F* and *S524T* encoded a CYP51 with a marked  
293 decrease in sensitivity to tebuconazole and propiconazole in both the mildew strains and the  
294 yeast system. This may be sufficient to account for the field failure (Figure 3). Increases in  
295 heme cavity volume and restriction of the access channel in *Y137F/S524T* protein models  
296 correlate well with the significant RF obtained (Figure 5). A high RF for propiconazole was  
297 also observed for the *Y137F/S524T Bgh CYP51* construct when expressed in the yeast  
298 system.

299 Structural modelling suggests that there are two main mechanisms that underpin the  
300 emergence of DMI resistance associated with mutational changes in *Bgh51*. The first  
301 mechanism is similar to that observed in *Z. tritici* CYP51 (Mullins et al., 2011), where the  
302 gross volume of the heme cavity increases with successive mutations (Table 2). There  
303 appears to be a correlation between the increase in cavity volume and the RFs reported in  
304 table 1. It is likely that any increase in heme cavity volume would perturb the orientation of  
305 the DMI ligand and hence its binding to the heme. This therefore differentiates the smaller  
306 DMI ligands such as tebuconazole and epoxiconazole.

307 The second mechanism at play provides a means of linking structural changes with  
308 phenotypic changes in a measurable way. Changes in distances between specific pairs of  
309 residues that border the cavity result in changes to the diameter of the access channel. The  
310 limiting of the binding surface between *Y226* and *S314* (*S312*) appears to correlate well with  
311 resistance to tebuconazole. The narrowing of the access channel between *Y226* and *S521*  
312 correlates particularly well, especially when tempered by consideration of the effects of each  
313 variant on the cavity volume. This is demonstrated by the result obtained when the product of  
314 the percent change in the heme cavity volume is multiplied by the percent change in the

## DMI resistance in *Bgh*

315 distance between *Y226* and *S521* (Figure 5). All the variants that contain *F137* demonstrate a  
316 substantially reduced distance between *Y226* and *S521* (Table 2). When one of the  
317 mechanisms is employed, moderate resistance factors are observed (*F137* (access channel  
318 narrowing); *T524* (substantial increase in cavity volume)). Although, when both mechanisms  
319 act together there is a strong correlation between the structural changes and the very high  
320 resistance factors of the *F137/T524* mutants in the presence of tebuconazole. The *in silico*  
321 creation of *Bgh51wt* and mutant CYP51 protein variants opens the possibility of future  
322 docking studies employing novel or unregistered DMI fungicides. This will allow the  
323 prediction the effectiveness of any new product prior to *in planta* testing. Furthermore, we  
324 can now recommend bespoke spray regimes depending on which *Bgh51* genotype is present  
325 in the field.

326

327 One of the major resistance strategies used for fungicides is to mix active compounds with  
328 different MOA because isolates with mutations conferring resistance to one fungicide will  
329 most likely still be sensitive to the second (Van Den Bosch et al., 2014). This strategy  
330 requires that there is no positive cross resistance between the two fungicides and so generally  
331 rules out mixtures of the same MOA. However some cases of negative cross-resistance  
332 within a single MOA group has been shown with *Z. tritici* isolates which are highly resistant  
333 to tebuconazole but fully susceptible to prochloraz (Leroux et al., 2007, Fraaije et al., 2007).  
334 The negative cross-resistance shown in both the *Bgh* (Figure 3) and yeast expression studies  
335 (Table 1) was confirmed using *in silico* protein docking studies. Here the single *Y137F*  
336 mutation substantially impaired the binding of fluquinconazole (Figure 4). In contrast, the  
337 binding of fluquinconazole at the docking site of the *Y137F/S524T* protein model was much  
338 akin to that of the wild-type.

339

340 The widespread use of highly susceptible varieties and the repeated use of a single MOA  
341 fungicide was a perfect recipe for an epidemic of fungicide resistance in West Australia. A  
342 review covering the decade from 1999 to 2009 estimated that *Bgh* in WA caused losses of  
343 AU\$30M p.a. (Murray & Brennan, 2010) However, given the spread of the highly virulent  
344 (Tucker et al., 2013) and DMI-resistant population of *Bgh* throughout the barley growing  
345 regions of WA, the losses can now be estimated to have been about AU\$100M p.a from  
346 2007 to 2010 (Tucker, 2015).

347

## DMI resistance in *Bgh*

### 348 Acknowledgements

349 We would like to thank Ryan Fowler from the Department of Environment and Primary  
350 Industries, Victoria, for supplying isolates. Further thanks to Harry Zhang for his technical  
351 assistance and to Simon Ellwood for the supply of isolates.

### 352 References

353

354

- 355 Abares, 2014. Australian Crop Report. In: Australia CO, ed. Canberra: Australian Bureau of  
356 Agricultural and Resource Economics and Sciences. (169.)
- 357 Apvma, 2014. Public Chemical Registration Information Systems Search. In: Authority APaVM, ed.  
358 <http://portal.apvma.gov.au/pubcris>. Australian Government. (2014.)
- 359 Becher R, Wirsel SGR, 2012. Fungal cytochrome P450 sterol 14 $\alpha$ -demethylase (CYP51) and azole  
360 resistance in plant and human pathogens. *Applied microbiology and biotechnology* **95**, 825-40.
- 361 Brent K, Hollomon DW, 2007. *Fungicide resistance: The assessment of risk*. Brussels, Belgium:  
362 Fungicide Resistance Action Committee.
- 363 Buschges R, Hollricher K, Panstruga R, *et al.*, 1997. The barley *Mlo* gene: a novel control element of  
364 plant pathogen resistance. *Cell* **88**, 695-705.
- 365 Chan KC, Boyd WJR, 1992. Pathogenic variation of powdery mildew of barley in Western Australia.  
366 *Australian Journal of Agricultural Research* **43**, 79-85.
- 367 Cools HJ, Fraaije BA, 2008. Are azole fungicides losing ground against Septoria wheat disease?  
368 Resistance mechanisms in *Mycosphaerella graminicola*. *Pest Management Science* **64**, 681-4.
- 369 Cools HJ, Hawkins NJ, Fraaije BA, 2013. Constraints on the evolution of azole resistance in plant  
370 pathogenic fungi. *Plant Pathology* **62**, 36-42.
- 371 Cools HJ, Mullins JGL, Fraaije BA, *et al.*, 2011. Impact of recently emerged sterol 14 $\alpha$ -demethylase  
372 (CYP51) variants of *Mycosphaerella graminicola* on azole fungicide sensitivity. *Applied and*  
373 *Environmental Microbiology* **77**, 3830-7.
- 374 Cools HJ, Parker JE, Kelly DE, Lucas JA, Fraaije BA, Kelly SL, 2010. Heterologous expression of mutated  
375 eburicol 14 $\alpha$ -demethylase (CYP51) proteins of *mycosphaerella graminicola* to assess effects on azole  
376 fungicide sensitivity and intrinsic protein function. *Applied and Environmental Microbiology* **76**,  
377 2866-72.
- 378 Czembor JH, 2000. Resistance to powdery mildew populations of barley landraces from Morocco.  
379 *Australasian Plant Pathology* **29**, 137-48.
- 380 Délye C, Bousset L, Corio-Costet MF, 1998. PCR cloning and detection of point mutations in the  
381 eburicol 14 $\alpha$ -demethylase (CYP51) gene from *Erysiphe graminis* f. sp. *hordei*, a 'recalcitrant' fungus.  
382 *Current Genetics* **34**, 399-403.
- 383 Dupont S, Lemetais G, Ferreira T, Cayot P, Gervais P, Beney L, 2012. Ergosterol biosynthesis: A fungal  
384 pathway for life on land? *Evolution* **66**, 2961-8.
- 385 Fraaije BA, Cools HJ, Kim SH, Motteram J, Clark WS, Lucas JA, 2007. A novel substitution I381V in the  
386 sterol 14 $\alpha$ -demethylase (CYP51) of *Mycosphaerella graminicola* is differentially selected by azole  
387 fungicides. *Molecular Plant Pathology* **8**, 245-54.
- 388 Frag, 2014. Fungicides approved for winter barley. In: Group-Uk FRA, ed. *Interactive Search Facility*.  
389 (2014.)
- 390 Grdc, 2012. Barley Powdery Mildew Fact Sheet: Control Strategies for Powdery Mildew. In. Western  
391 Region: CORETEXT.

## DMI resistance in *Bgh*

- 392 Grimmer MK, Van Den Bosch F, Powers SJ, Paveley ND, 2015. Fungicide resistance risk assessment  
393 based on traits associated with the rate of pathogen evolution. *Pest Management Science* **71**, 207-  
394 15.
- 395 Hendlich M, Rippmann F, Barnickel G, 1997. LIGSITE: automatic and efficient detection of potential  
396 small molecule-binding sites in proteins. *Journal of Molecular Graphics and Modelling* **15**, 359-63.
- 397 Hull CM, Parker JE, Bader O, *et al.*, 2012. Facultative sterol uptake in an ergosterol-deficient clinical  
398 isolate of *Candida glabrata* harboring a missense mutation in *ERG11* and exhibiting cross-resistance  
399 to azoles and amphotericin B. *Antimicrobial Agents and Chemotherapy* **56**, 4223-32.
- 400 Lelièvre L, Groh M, Angebault C, Maherault AC, Didier E, Bougnoux ME, 2013. Azole resistant  
401 *Aspergillus fumigatus*: An emerging problem. *Medecine et Maladies Infectieuses* **43**, 139-45.
- 402 Leroux P, Albertini C, Gautier A, Gredt M, Walker AS, 2007. Mutations in the CYP51 gene correlated  
403 with changes in sensitivity to sterol 14 $\alpha$ -demethylation inhibitors in field isolates of *Mycosphaerella*  
404 *graminicola*. *Pest Management Science* **63**, 688-98.
- 405 Lord A, 2014. PestFax Data - Berley Powdery Mildew. In: Food DOaA, ed. Perth, WA.
- 406 Mair W, Lopez-Ruiz F, Stammler G, *et al.*, 2016. Proposal for a unified nomenclature for target-site  
407 mutations associated with resistance to fungicides. *Pest Management Science* **72**, 1449-59.
- 408 Mullins JGL, Parker JE, Cools HJ, *et al.*, 2011. Molecular modelling of the emergence of azole  
409 resistance in *Mycosphaerella graminicola*. *PLoS ONE* **6**.
- 410 Murray G, Brennan J, 2010. Estimating disease losses to the Australian barley industry. *Australasian*  
411 *Plant Pathology* **39**, 85-96.
- 412 Oliver RP, Hewitt HG, 2014. *Fungicides in crop protection: Second edition*.
- 413 Omrane S, Sghyer H, Audéon C, *et al.*, 2015. Fungicide efflux and the MgMFS1 transporter contribute  
414 to the multidrug resistance phenotype in *Zygomycetia tritici* field isolates. *Environmental*  
415 *Microbiology* **17**, 2805-23.
- 416 Parker JE, Merkamm M, Manning NJ, Pompon D, Kelly SL, Kelly DE, 2008. Differential azole antifungal  
417 efficacies contrasted using a *Saccharomyces cerevisiae* strain humanized for sterol 14 $\alpha$ -demethylase  
418 at the homologous locus. *Antimicrobial Agents and Chemotherapy* **52**, 3597-603.
- 419 Parker JE, Warrilow AGS, Cools HJ, *et al.*, 2013. Prothioconazole and prothioconazole-desthio  
420 activities against *Candida albicans* sterol 14- $\alpha$ -Demethylase. *Applied and Environmental*  
421 *Microbiology* **79**, 1639-45.
- 422 Russell PE, 2005. A century of fungicide evolution. *The Journal of Agricultural Science* **143**, 11-25.
- 423 Senior IJ, Hollomon DW, Loeffler RS, Baldwin BC, 1995. Sterol composition and resistance to DMI  
424 fungicides in *Erysiphe graminis*. *Pesticide Science* **45**, 57-67.
- 425 Spanu PD, Abbott JC, Amselem J, *et al.*, 2010. Genome expansion and gene loss in powdery mildew  
426 fungi reveal tradeoffs in extreme parasitism. *Science* **330**, 1543-6.
- 427 Tucker MA, Jayasena K, Ellwood SR, Oliver RP, 2013. Pathotype variation of barley powdery mildew  
428 in Western Australia. *Australasian Plant Pathology* **42**, 617-23.
- 429 Tucker MA, Lopez-Ruiz F, Jayasena K, Oliver RP, 2015. Origin of Fungicide-Resistant Barley Powdery  
430 Mildew in Western Australia: Lessons to Be Learned. In: Ishii H, Holloman D, eds. *Fungicide*  
431 *Resistance in Plant Pathogens; Principles and Guide to Practical Management*. Springer, 329-40.
- 432 Tucker MA, Lopez-Ruiz, F, Jayasena K, Oliver R.P., 2015. Origin of the Fungicide-Resistant Barley  
433 Powdery Mildew in Western Australia: lessons to be learned. In: Ishii H, ed. *Fungicide*  
434 *Resistance in Plant Pathogens*. Japan: Springer, 329-40.
- 435 Van Den Bosch F, Paveley N, Van Den Berg F, Hobbelen P, Oliver R, 2014. Mixtures as a fungicide  
436 resistance management tactic. *Phytopathology* **104**, 1264-73.
- 437 Wyand RA, Brown JKM, 2005. Sequence variation in the CYP51 gene of *Blumeria graminis* associated  
438 with resistance to sterol demethylase inhibiting fungicides. *Fungal Genetics and Biology* **42**, 726-35.
- 439 Xiang MJ, Liu JY, Ni PH, *et al.*, 2013. *Erg11* mutations associated with azole resistance in clinical  
440 isolates of *Candida albicans*. *FEMS Yeast Research* **13**, 386-93.

441

## DMI resistance in *Bgh*

### 442 **Abbreviations**

|     |         |                 |
|-----|---------|-----------------|
| 443 | Cyp     | Cyproconazole   |
| 444 | Desthio | Desthioconazole |
| 445 | Epoxi   | Epoxyconazole   |
| 446 | Fluquin | Fluquinconazole |
| 447 | Flut    | Flutriafol      |
| 448 | Propi   | Propiconazole   |
| 449 | Prothio | Prothioconazole |
| 450 | Teb     | Tebuconazole    |
| 451 | Triad   | Triadimefon     |

## DMI resistance in *Bgh*

452 Table 1: Resistance factors of *S. cerevisiae* YUG37:*erg11* transformants.

| Construct containing mutation/s      | Resistance Factors |       |       |         |     |      |       |         |
|--------------------------------------|--------------------|-------|-------|---------|-----|------|-------|---------|
|                                      | Teb                | Epoxi | Propi | Desthio | Cyp | Flut | Triad | Fluquin |
| pYES- <i>Bgh51_Y137F</i>             | 1.1                | 3.7   | 1.6   | 3.3     | 1.0 | 1.4  | 1.5   | 9.7     |
| pYES- <i>Bgh51_K172E</i>             | 0.9                | 1.4   | 0.6   | 2.1     | 0.9 | 1.0  | 0.9   | 0.2     |
| pYES- <i>Bgh51_M304I</i>             | 0.9                | 1.8   | 2.1   | 0.2     | 0.7 | 0.5  | 0.5   | 0.1     |
| pYES- <i>Bgh51_S524T</i>             | 3.7                | 7.3   | 12.4  | 1.2     | 2.1 | 2.7  | 3.6   | 0.5     |
| pYES- <i>Bgh51_Y137F/K172E</i>       | 1.3                | 2.4   | 1.9   | 0.9     | 0.9 | 1.3  | 3.3   | 0.2     |
| pYES- <i>Bgh51_Y137F/S524T</i>       | 33.2               | 18.5  | 340.6 | 0.8     | 3.2 | 10.5 | 23.8  | 0.2     |
| pYES- <i>Bgh51_Y137F/S524T/M304I</i> | 2.3                | 4.9   | 2.8   | 0.1     | 0.8 | 1.9  | 5.7   | <0.1    |

453 Resistance factors (RF) were calculated from the mean EC<sub>50</sub> values of eight independent  
 454 replicates. RF <1 indicates greater sensitivity than the wild-type construct. No growth was  
 455 observed for the pYES3/CT construct.

456

457 Table 2: Measurements of heme cavity volume and key inter-residue distances in wild-type  
 458 genotype *Y137/K172/M304/R330/S524* (WT) and mutant *Bgh* CYP51.

| CYP51 genotype                 | Heme cavity volume (Å <sup>3</sup> ) | ΔHCV <sup>a</sup> from WT | Diameter channel to binding site <sup>b</sup> | ΔChannel diameter from WT | ΔHCV x ΔChannel diameter |
|--------------------------------|--------------------------------------|---------------------------|-----------------------------------------------|---------------------------|--------------------------|
| Wild-type                      | 1809                                 | -                         | 12.862                                        |                           |                          |
| <i>Y137F</i>                   | 2526                                 | +39.6%                    | 9.202                                         | -28.5%                    | 0.113                    |
| <i>K172E</i>                   | 2130                                 | +17.7%                    | 11.861                                        | -7.8%                     | 0.014                    |
| <i>M304I</i>                   | 2573                                 | +42.2%                    | 12.015                                        | -6.6%                     | 0.028                    |
| <i>R330G</i>                   | 2607                                 | +44.1%                    | 12.074                                        | -6.1%                     | 0.027                    |
| <i>S524T</i>                   | 3134                                 | +73.2%                    | 10.233                                        | -20.4%                    | 0.149                    |
| <i>Y137F/K172E</i>             | 2334                                 | +29.0%                    | 10.870                                        | -15.5%                    | 0.045                    |
| <i>Y137F/S524T</i>             | 3327                                 | +83.9%                    | 9.294                                         | -28.7%                    | 0.241                    |
| <i>Y137F/M304I/R330G/S524T</i> | 2181                                 | +20.6%                    | 9.960                                         | -22.6%                    | 0.047                    |

459

460 <sup>a</sup>ΔHCV – change in heme cavity volume.

461 <sup>b</sup>Distance between key amino acids *Y226-S315* which border the entrance to the DMI binding site.

462



### DMI resistance in *Bgh*

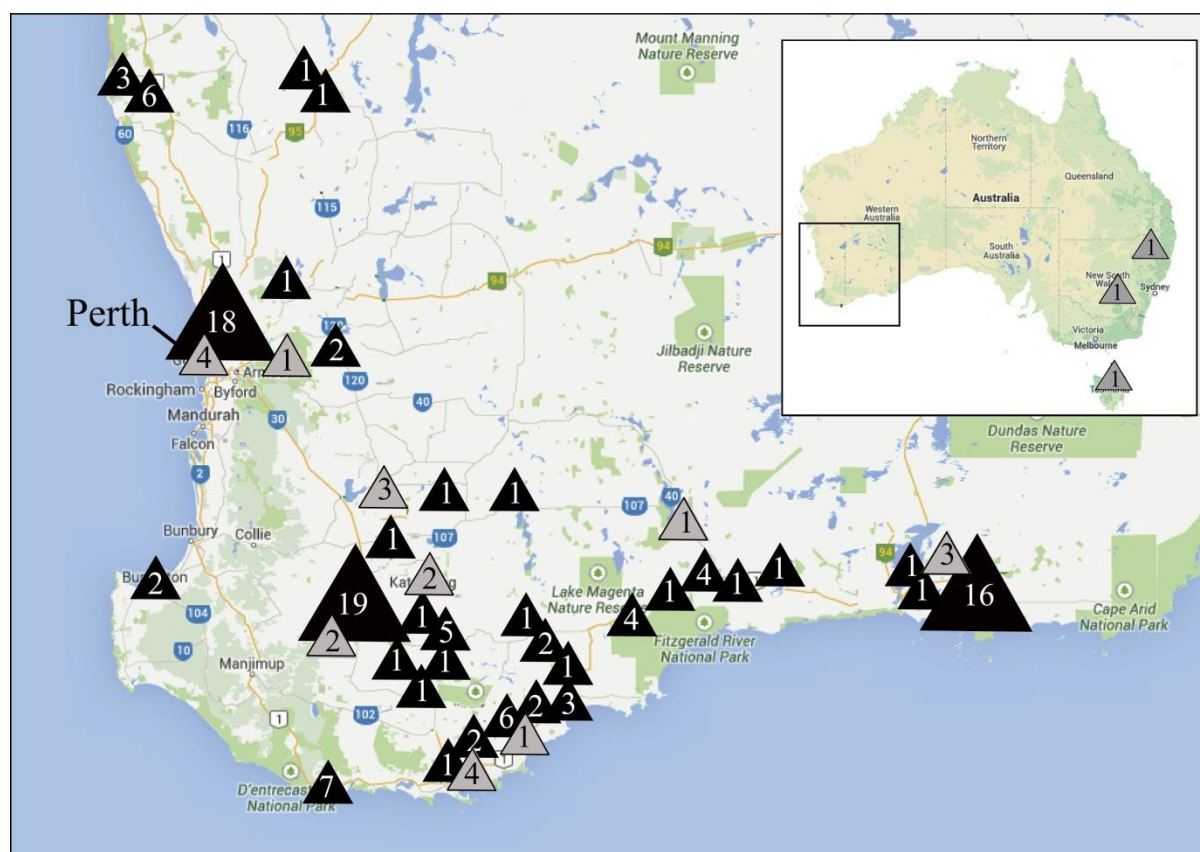

463

464 Fig. 1: Sample sites of *Bgh* isolates collected from Australia. Black triangles indicate mutant  
465 *T524 CYP51* isolates (n = 119). Grey triangles indicate isolates with *CYP51* genotype *S524* (n  
466 = 24). Numbers within triangles indicate isolates collected at each site.

467

### DMI resistance in *Bgh*

468  
 469 WA\_1 ...FGTDVV**F**DPCNS...IQNEVK**S**FIEK...KEIAH**I**MIALL...LWLA**A**GPDI**T**E...DYSSM**F**TRP**M**APA...  
 470 WA\_2 ...FGTDVV**F**DPCNS...IQNEVK**S**FIEK...KEIAH**M**MIALL...LWLAAR**P**DI**T**E...DYSSM**F**TRP**M**APA...  
 471 NSW ...FGTDVV**F**DPCNS...IQNEV**E**SFIEK...KEIAH**M**MIALL...LWLAAR**P**DI**T**E...DYSSM**F**SRP**M**APA...  
 472 TAS ...FGTDVV**F**DPCNS...IQNEVK**S**FIEK...KEIAH**M**MIALL...LWLAAR**P**DI**T**E...DYSSM**F**SRP**M**APA...  
 473 DH14 ...FGTDVVYDCPNS...IQNEVK**S**FIEK...KEIAH**M**MIALL...LWLAAR**P**DI**T**E...DYSSM**F**SRP**M**APA...  
 474 *Z. tri* ...FGKDVVYDCPNS...IAA**E**TRQ**F**FFDR...KEIAH**M**MIALL...LRLAS**R**PDI**Q**D...DYSS**L**FSR**P**L**S**PA...  
 475 . 137 172 304 330 524

476 **Figure 2.** Sequence alignment of fragments of the *Cyp51* protein family. Changes found in  
 477 Australian *Bgh* isolates to that of the wild-type DH14 (ABSB01000011.1) are indicated in  
 478 black. Numbers represent amino acid positions. *Blumeria graminis* f. sp. *hordei* isolates  
 479 WA\_1 (Western Australia 1), WA\_2 (Western Australia 2), NSW (Wagga Wagga) and TAS  
 480 (Launceston) are aligned with *Zymoseptoria tritici* isolate ST1 (GenBank Accession  
 481 AY730587).

482

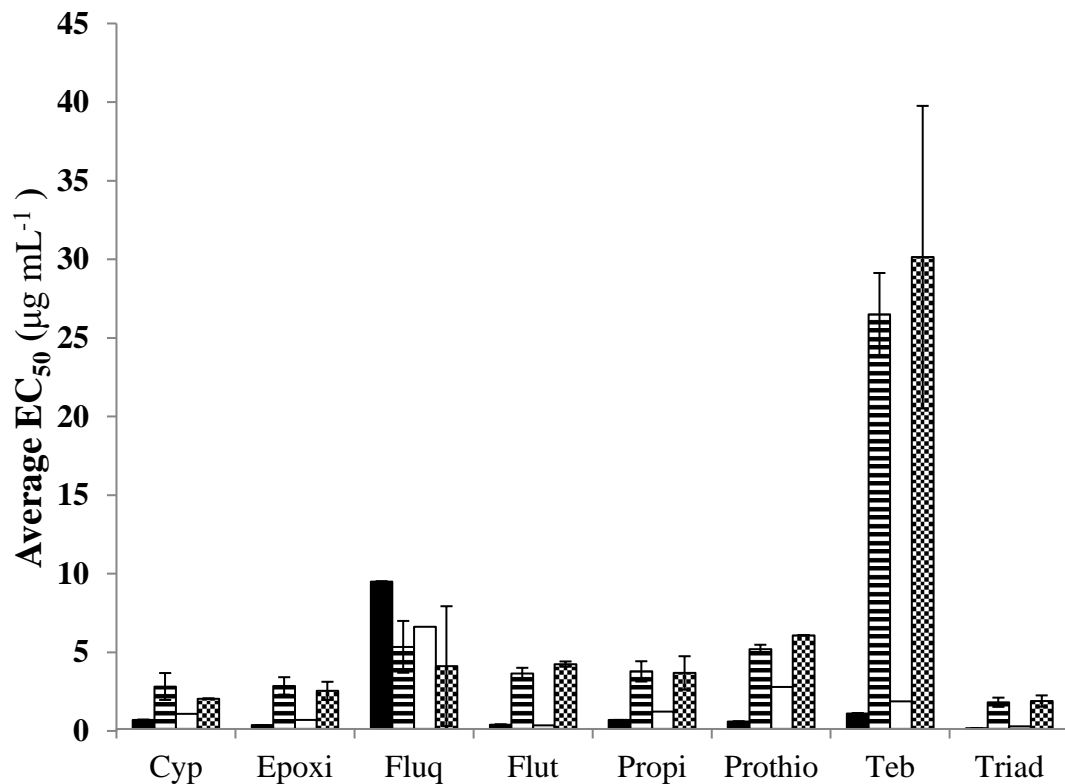

483

484 Fig. 3: Box plots of the  $EC_{50}$  ( $\mu\text{g mL}^{-1}$ ) of a collection of *Bgh* isolates having one of four  
 485 *Cyp51* genotypes identified in Australia. Genotype 1 (black) - *F137*, genotype 2 – (stripes)  
 486 *F137/T524*, genotype 3 – (blank) *F137/E172* and genotype 4 – (crosshatch)  
 487 *F137/I304/R330/T524*. Bars represent mean  $EC_{50}$  ( $\mu\text{g mL}^{-1}$ ) of genotypes, with error bars  
 488 indicated.

### DMI resistance in *Bgh*

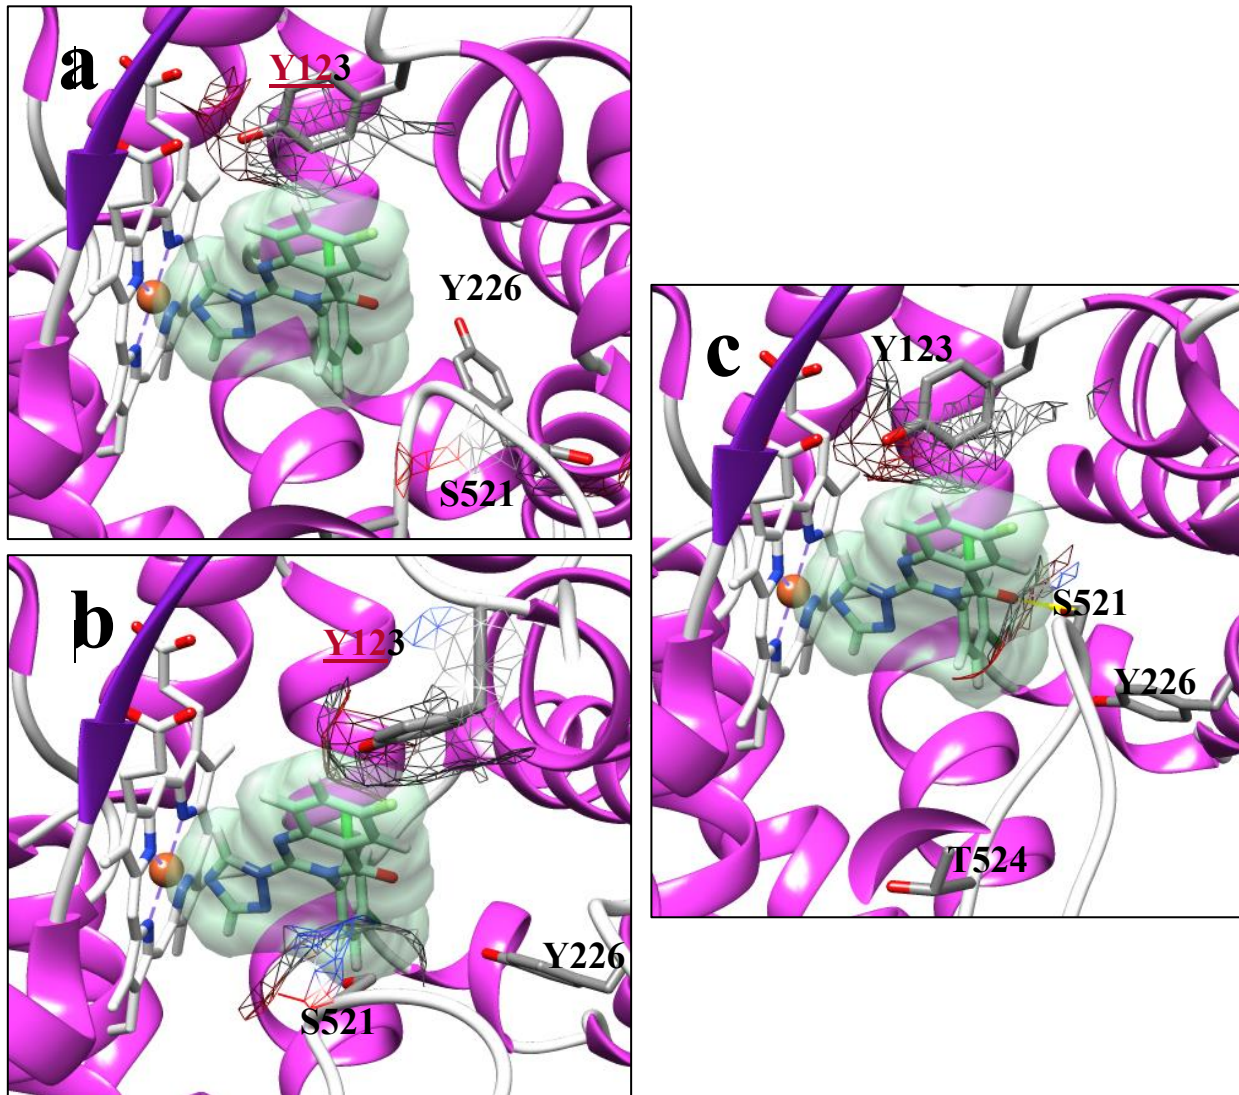

489

490

491 Fig. 4: Docking of fluquinconazole in *Blumeria graminis* f. sp. *CYP51*.

492 A) Wild type CYP51, showing bound fluquinconazole (in light green, centre) and steric

493 interaction with Y123 (surface shown as mesh). B) The Y137F mutant, showing

494 encroachment of Y123 and S521 (surface shown as mesh) upon the docking site of

495 fluquinconazole, indicating that the compound cannot be bound at that location. C) The

496 Y137F-S524T mutant, showing orientation of Y123 similar to wild type and predicted

497 interaction with S521 (shown in yellow).

498

### DMI resistance in *Bgh*

499

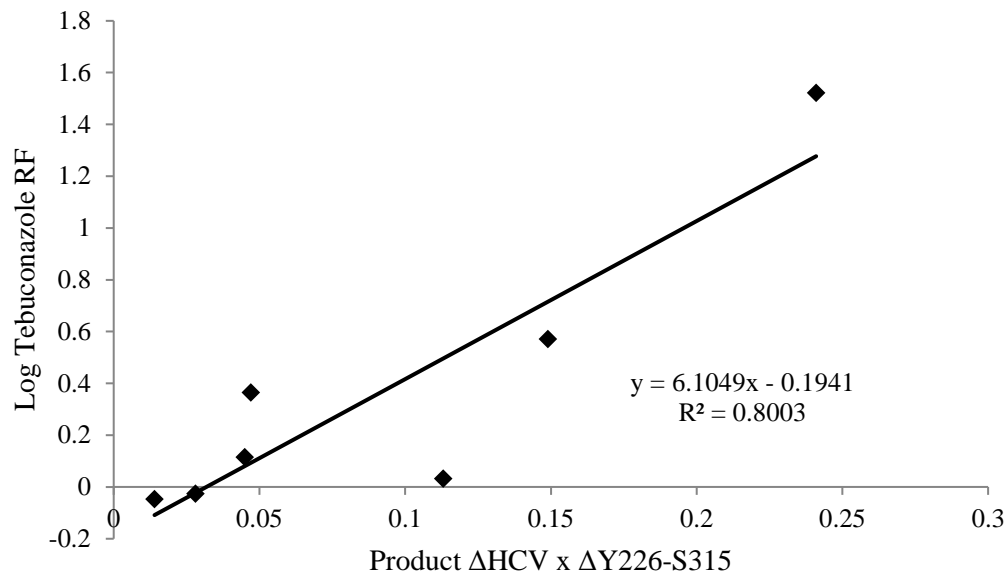

500

501 Fig. 5: Correlation between tebuconazole resistance factor (RF) of pYES-  
502 *Bgh51\_Y137F/S524T* and the product of the change in the volume of the heme cavity  
503 ( $\Delta$ HCV) with the change in distance between amino acids *Y226* and *S315* ( $\Delta$ Y226-S312).

504

505

## DMI resistance in *Bgh*

506

### 507 **Supporting Information**

508 Supporting Information Table S1: Details of collection and *CYP51* genotype of the seventy-  
509 three *Bgh* isolates sequenced using Sanger technology in this study.

510 Supporting Information Table S2: Average *in vitro* EC<sub>50</sub> and resistance factors of *T524* and  
511 *S524 Bgh51* isolates when exposed to currently registered DMIs in WA.

512 Supporting Information Table S3: Primers used for sequencing and site-directed mutagenesis.

513 Supporting Information Fig. S1: Binding position of primers used to sequence the length of  
514 *Bgh51* including the 5' promoter region.

515

516 Supporting Information Fig. S2: Complementation of *S. cerevisiae* strain YUG37:*erg11* with  
517 wild type (*Bgh51wt*) and mutated variants.

518 Supporting Information Table S4: Growth rate analysis of *S. cerevisiae* YUG37:*erg11*  
519 transformants.

520

521 Supporting Information Fig. S3: Nucleotide alignment of the *CYP51* gene of five isolates of  
522 *Bgh*.

523 Supporting Information Fig. S4: Average *in vitro* EC<sub>50</sub> (µg mL<sup>-1</sup>) of Australian *Bgh* isolates  
524 from four distinct genotypes 1 – *F137*, 2 – *F137/T524*, 3 – *F137/E172* and 4 –  
525 *F137/I304/G330/T524*.

526

527 Supporting Information Table S5: EC<sub>50</sub> and resistance factors of the pYES-*Bgh51* yeast  
528 mutants when exposed to currently registered DMIs in Western Australia.

529

530 Supporting Information Fig. S5: Structural modelling of *Bgh* CYP51.

531

532

### DMI resistance in *Bgh*

| Collection year | Collection site | State <sup>a</sup> | Number of isolates <sup>b</sup> | <i>CYP51</i> genotype <sup>c</sup> |
|-----------------|-----------------|--------------------|---------------------------------|------------------------------------|
| 2009            | Beverly         | WA                 | 1                               | 1                                  |
| 2009            | Katanning       | WA                 | 1                               | 1                                  |
| 2009            | Mt Madden       | WA                 | 2                               | 1                                  |
| 2009            | South Perth     | WA                 | 1                               | 1                                  |
| 2009            | Williams        | WA                 | 1                               | 1                                  |
| 2010            | Kojonup         | WA                 | 2                               | 1                                  |
| 2010            | Scaddan         | WA                 | 1                               | 2                                  |
| 2010            | South Perth     | WA                 | 1                               | 1                                  |
| 2010            | South Stirlings | WA                 | 7                               | 1                                  |
| 2010            | South Stirlings | WA                 | 1                               | 2                                  |
| 2011            | Albany          | WA                 | 3                               | 4                                  |
| 2011            | Boxwood Hill    | WA                 | 3                               | 4                                  |
| 2011            | Bentley         | WA                 | 2                               | 4                                  |
| 2011            | Esperance       | WA                 | 1                               | 1                                  |
| 2011            | Esperance       | WA                 | 6                               | 4                                  |
| 2011            | Gibson          | WA                 | 5                               | 4                                  |
| 2011            | Gnowellen       | WA                 | 1                               | 4                                  |
| 2011            | Kojaneerup      | WA                 | 3                               | 4                                  |
| 2011            | Northam         | WA                 | 1                               | 4                                  |
| 2011            | South Perth     | WA                 | 1                               | 4                                  |
| 2011            | South Stirlings | WA                 | 5                               | 4                                  |
| 2011            | Takalarup       | WA                 | 2                               | 4                                  |
| 2011            | Tamworth        | NSW                | 1                               | 3                                  |
| 2011            | Launceston      | TAS                | 1                               | 1                                  |
| 2011            | Wagga Wagga     | NSW                | 1                               | 3                                  |
| 2011            | Wellstead       | WA                 | 2                               | 4                                  |
| 2012            | Badgingarra     | WA                 | 1                               | 4                                  |
| 2012            | Esperance       | WA                 | 1                               | 4                                  |
| 2012            | Esperance       | WA                 | 1                               | 1                                  |
| 2012            | Kojonup         | WA                 | 6                               | 4                                  |
| 2012            | Northam         | WA                 | 1                               | 4                                  |
| 2012            | Southern River  | WA                 | 1                               | 4                                  |
| 2013            | Kojonup         | WA                 | 6                               | 4                                  |

533

534 Supp Table 1. Origin of isolates used in the study.

535 <sup>a</sup>Australian state abbreviations: WA - Western Australia, TAS - Tasmania and NSW - New  
536 South Wales.

537 <sup>b</sup>A high-throughput method was employed to detect the presence of the *S524T* mutation in a  
538 further 46 isolates.

539 <sup>c</sup>Genotypes are as follows 1 –*F137*, 2 – *F137/T524*, 3 –*F137/E172* and 4 –  
540 *F137/I304/R330/T524*.

541

DMI resistance in *Bgh*

542 Supporting Information Table S2: Average *in vitro* EC<sub>50</sub> and resistance factors of T509 and  
 543 S509 *Bgh51* isolates when exposed to currently registered triazoles in WA.

| Triazole        | EC <sub>50</sub> (mg L <sup>-1</sup> ) |               | Resistance Factor <sup>a</sup> |
|-----------------|----------------------------------------|---------------|--------------------------------|
|                 | S524 isolates                          | T524 isolates |                                |
| Tebuconazole    | 2.61±0.5<br>2                          | 29.88±9.29    | 12.17                          |
| Epoxiconazole   | 3.73±0.8<br>7                          | 2.61±0.52     | 4.27                           |
| Propiconazole   | 1.88±0.2<br>9                          | 3.73±0.87     | 3.41                           |
| Triadimefon     | 6.08±0.0<br>0                          | 1.88±0.29     | 7.51                           |
| Prothioconazole | 4.05±0.3<br>6                          | 6.08±0.00     | 10.34                          |
| Flutriafol      | 2.44±0.5<br>5                          | 4.05±0.36     | 4.05                           |
| Cyproconazole   | 4.73<br>±0.67                          | 2.44±0.55     | 2.54                           |
| Fluquinconazole | 8.06±3.4<br>6                          | 4.73 ±0.67    | 0.58                           |

544

545 <sup>a</sup>Calculated as the average fold change in EC<sub>50</sub> of isolates harbouring the T509 mutation in  
 546 *CYP51* compared to isolates harbouring the S509 *CYP51* allele.

547

548

DMI resistance in *Bgh*

549 Supporting Information Table S2: Primers used for sequencing and site-directed mutagenesis.

| Primer              | Sequence (5' to 3')                                 | Introduced <i>CYP51</i> alteration |
|---------------------|-----------------------------------------------------|------------------------------------|
| <i>Bgh51</i> _PrF   | GGCATCGTGGATTATCTACC                                | -                                  |
| <i>Bgh51</i> _PrR   | CCGAGTTGGAGCAAAGGC                                  | -                                  |
| <i>Bgh51</i> _1F    | TAGACTTCCATTTTCCGTCCT                               | -                                  |
| <i>Bgh51</i> _1R    | GGGTGTGTGAAGCAGTGTATATCGT                           | -                                  |
| <i>Bgh51</i> _2F    | TATCGATGCAGTAATGGCTGA                               | -                                  |
| <i>Bgh51</i> _2R    | AGTGTCCCAACGATGTGGAT                                | -                                  |
| <i>Bgh51</i> _3F    | AGTAAAGAATCCAATGCCCGT                               | -                                  |
| <i>Bgh51</i> _3R    | CATCAATTGGCAGGTAGTGA                                | -                                  |
| <i>Bgh51</i> _Y137F | P-CCTGTCTTCGGGACTGATGTAGTG<br>TTTGACTGTCCTAATTCAA   | <i>Y137F</i>                       |
| <i>Bgh51</i> _K172E | P-CTATCATCCAAAATGAAGTGGAAAG<br>CTTTATCGAAAAATGCGACG | <i>K172E</i>                       |
| <i>Bgh51</i> _M304I | P-GAGATTGCACACAT <u>T</u> ATGATCGCG<br>CTCCTGA      | <i>M304I</i>                       |
| <i>Bgh51</i> _R330G | P-GCTGTGGCTTGCTGCTGGACCAGAC<br>ATCACTG              | <i>R330G</i>                       |
| <i>Bgh51</i> _S524T | P-CTCAAGTATGTTT <u>A</u> CTCGGCCAATGG<br>CACCTGCC   | <i>S524T</i>                       |

550

551 “P” indicates 5’ phosphate. Underlining indicates an altered nucleotide. Numbers refer to  
 552 amino acid positions in *Bgh51* (numbers in parentheses refer to amino acid positions in *Z.*  
 553 *tritici*).



### DMI resistance in *Bgh*

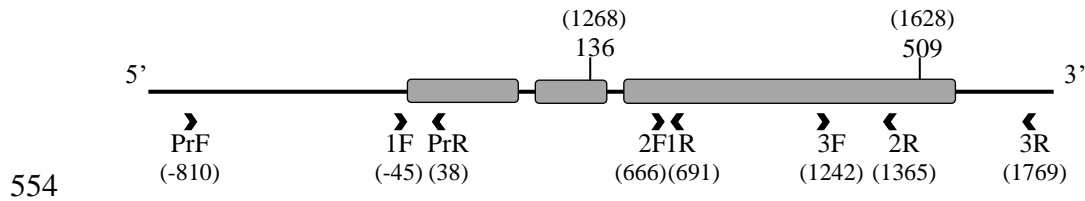

554

555 Supporting Information Fig. S1: Binding position of primers used to sequence the length of

556 *Bgh51* including the 5' promoter region. Exons are represented by grey bars with primer

557 binding sites as directional arrows. Names of *Bgh51* primers are in reference to

558 supplementary table 4 with position of 5' nucleotide given in parenthesis. Positions of amino

559 acids 136 and 509 have been indicated with the position of the mutated base given in

560 parenthesis

561

### DMI resistance in *Bgh*

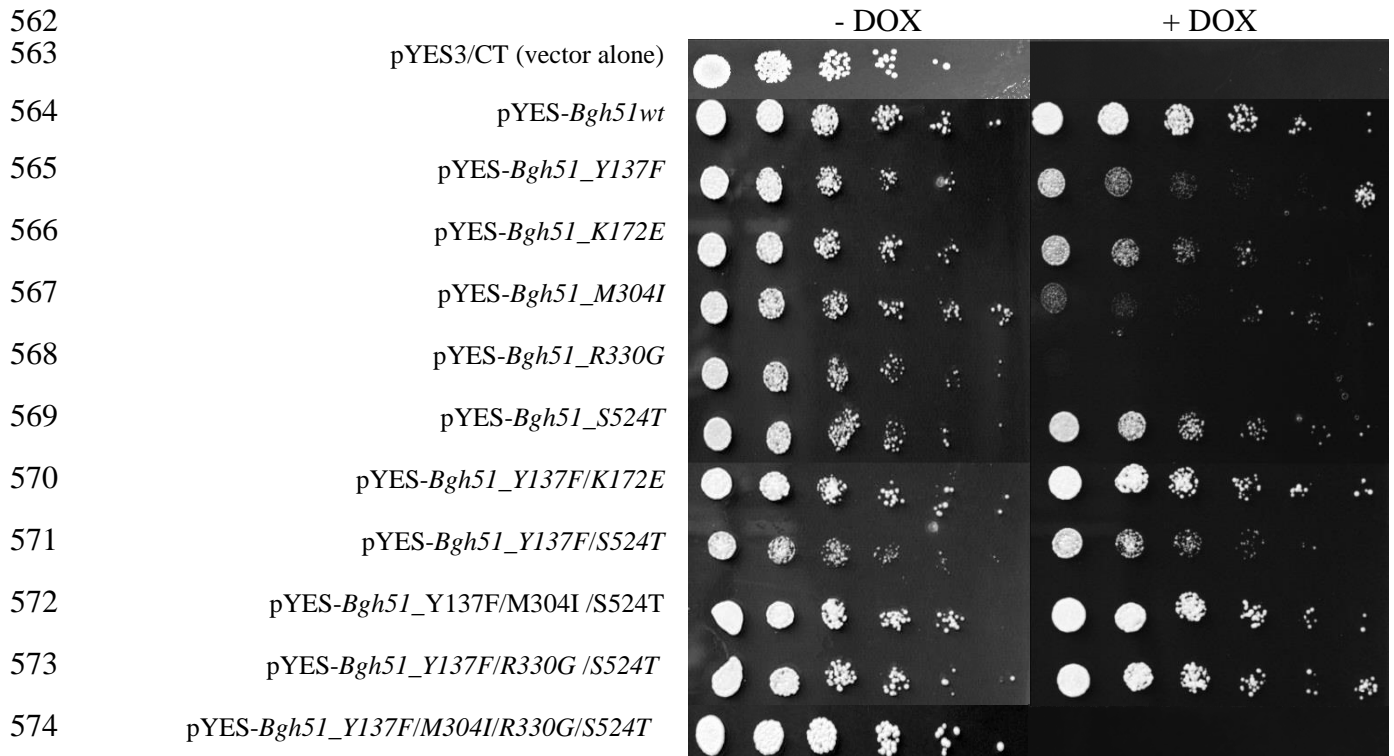

575 Supporting Information Fig. S2: Complementation of *S. cerevisiae* strain YUG37:*erg11* with  
576 wild type (*Bgh51wt*) and mutated variants. Growth in the absence (-DOX) and presence  
577 (+DOX) of doxycycline is shown. Numbers refer to amino acid positions in *Z. tritici*.

578

DMI resistance in *Bgh*

579 Supporting Information Table S3: Growth rate analysis of *S. cerevisiae* YUG37:*erg11*  
 580 transformants.

581

| Construct                                  | Maximum growth rate <sup>a</sup> |                  |
|--------------------------------------------|----------------------------------|------------------|
|                                            | -DOX                             | +DOX             |
| pYES3/CT (vector alone)                    | 19.7 ± 1.0                       | No growth        |
| pYES- <i>Bgh51wt</i>                       | 19.0 ± 1.3                       | 3.9 ± 0.7        |
| pYES- <i>Bgh51_Y137F</i>                   | 17.9 ± 2.2                       | 4.0 ± 1.3        |
| pYES- <i>Bgh51_K172E</i>                   | 18.2 ± 1.7                       | 3.8 ± 1.4        |
| pYES- <i>Bgh51_M304I</i>                   | 19.2 ± 1.2                       | 3.6 ± 0.2        |
|                                            |                                  | No growth        |
| pYES- <i>Bgh51_R330G</i>                   | 18.6 ± 1.0                       | 3.8 ± 1.3        |
| pYES- <i>Bgh51_S524T</i>                   | 19.1 ± 4.3                       | 3.4 ± 0.6        |
| pYES- <i>Bgh51_Y137F/K172E</i>             | 18.8 ± 1.2                       | 3.8 ± 0.6        |
| pYES- <i>Bgh51_Y137F/S524T</i>             | 18.2 ± 1.6                       | 3.4 ± 0.6        |
| pYES- <i>Bgh51_Y137F/M304I /S524T</i>      | 18.5 ± 1.3                       | <b>1.5 ± 0.6</b> |
| pYES- <i>Bgh51_Y137F/R330G /S524T</i>      | 18.1 ± 2.0                       | <b>2.3 ± 2.3</b> |
| pYES- <i>Bgh51_Y137F/M304I/R330G/S524T</i> | 17.8 ± 1.0                       | <b>2.3 ± 2.3</b> |

582

583 <sup>a</sup>Values represent the greatest increase in OD<sub>600</sub> (10<sup>-2</sup>) in the absence (-DOX) or presence

584 (+DOX) of doxycycline over a 2h period and are the means of 12 independent replicates ±

585 standard deviations. Growth rates significantly different from the wild type construct (pYES-

586 *Bgh51wt*) are given in bold. Numbers refer to amino acid positions in *Z. tritici*.

587

### DMI resistance in *Bgh*

588 Supp Table 4. *In vitro* EC<sub>50</sub> and resistance factors of T524 (T509) and S524 (S509) *Bgh* isolates when exposed  
589 to currently registered triazoles in WA.

| Fungicide       | EC <sub>50</sub> (mg liter <sup>-1</sup> ) |               | Resistance Factor |
|-----------------|--------------------------------------------|---------------|-------------------|
|                 | T524 isolates                              | S524 isolates |                   |
| Tebuconazole    | 29.88±4.02                                 | 1.7±0.65      | 17.61             |
| Epoxiconazole   | 2.61±0.52                                  | 0.61±0.48     | 4.27              |
| Propiconazole   | 3.73±0.87                                  | 1.09±0.59     | 3.41              |
| Triadimefon     | 1.88±0.29                                  | 0.59±0.19     | 7.51              |
| Prothioconazole | 6.08±0.00                                  | 0.59±0.19     | 10.34             |
| Flutriafol      | 4.05±0.36                                  | 0.37±0.26     | 10.92             |
| Cyproconazole   | 2.44±0.55                                  | 0.96±0.64     | 2.54              |

590

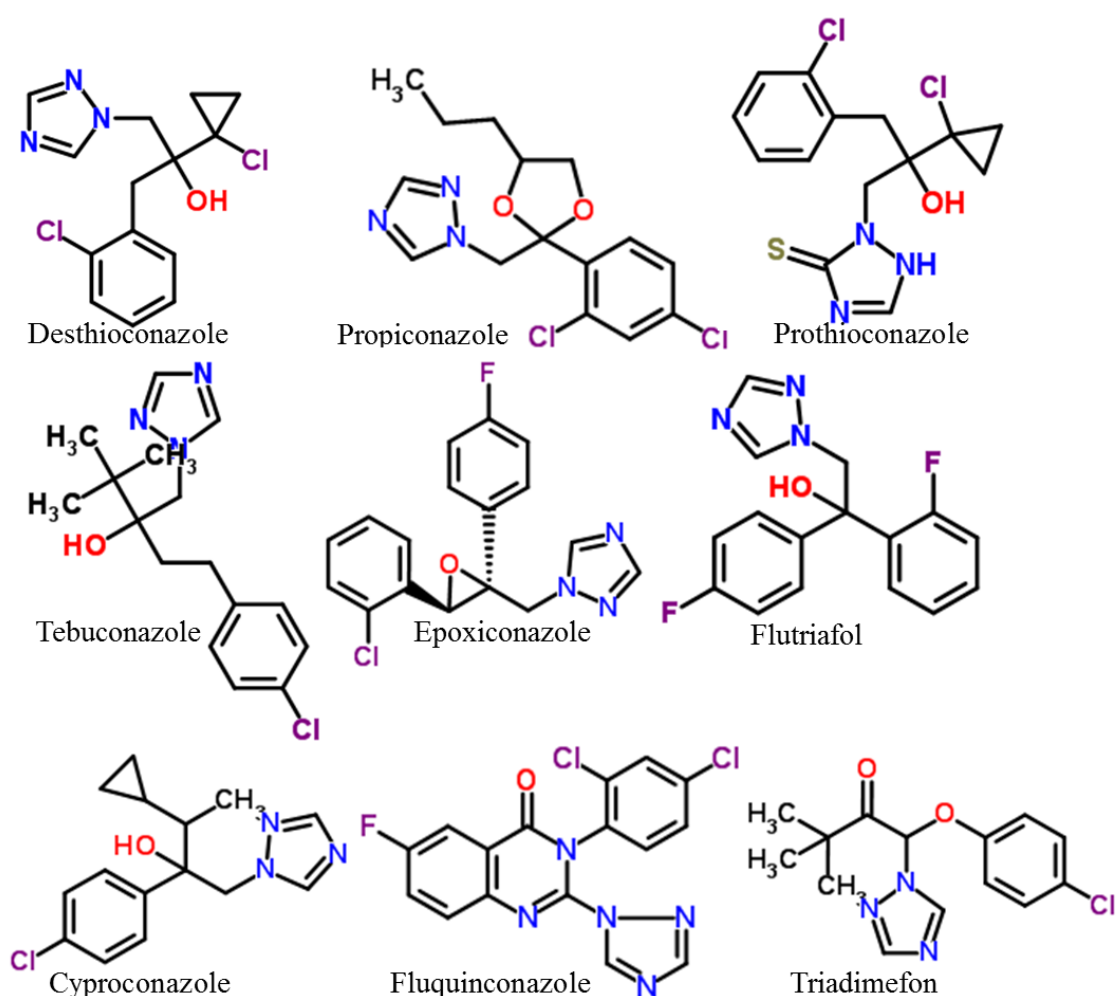

## DMI resistance in *Bgh*

595
